# Supplementary material
Source: publisher site journal article supplement (https://thieme-connect.com/media/10.1055-s-00035024/201204/supmat/10-1160-th12-01-0027-supp.pdf)
Supplement: Supplementary file 1 [file 10-1160-th12-01-0027-supp.pdf]

**Online Appendix to Alonso-Coello et al. ‘Home-monitoring of oral anticoagulation vs. dabigatran. An indirect comparison’ (Thromb Haemost 2012; 108.4)**

**APPENDIX 1. EVIDENCE PROFILES**

**Evidence profile 1. Home-monitoring vs. usual management**

| Trials                                    | Risk of bias                                                                     | Inconsistency                                   | Imprecision                                                  | Indirectness            | Publication bias | Overall quality | Study event rates (%) |                      | Relative effect (95%CI) <sup>1</sup> | Absolute effect            |                                                              |
|-------------------------------------------|----------------------------------------------------------------------------------|-------------------------------------------------|--------------------------------------------------------------|-------------------------|------------------|-----------------|-----------------------|----------------------|--------------------------------------|----------------------------|--------------------------------------------------------------|
|                                           |                                                                                  |                                                 |                                                              |                         |                  |                 | With usual monitoring | With home-monitoring |                                      | Risk with usual monitoring | Risk difference with home monitoring (95%CI)                 |
| <b>Thromboembolism (CRITICAL OUTCOME)</b> |                                                                                  |                                                 |                                                              |                         |                  |                 |                       |                      |                                      |                            |                                                              |
| 12 RCTs<br>12 months mean follow-up       | No serious risk of bias.<br>Lack of information regarding allocation concealment | No serious inconsistency<br>I <sup>2</sup> =3%  | No serious imprecision                                       | No serious indirectness | Not detected     | ⊕⊕⊕⊕<br>High    | 97/2136<br>(4.5%)     | 48/2376<br>(2.0%)    | 0.45<br>(0.32–0.64)                  | 45 per 1000 patients       | 25 fewer thromboembolic events per 1000 (14 to 35 less)      |
| <b>Death (CRITICAL OUTCOME)</b>           |                                                                                  |                                                 |                                                              |                         |                  |                 |                       |                      |                                      |                            |                                                              |
| 9 RCTs<br>12 months mean follow-up        | No serious risk of bias.<br>Lack of information regarding allocation concealment | No serious inconsistency<br>I <sup>2</sup> =34% | No serious imprecision                                       | No serious indirectness | Not detected     | ⊕⊕⊕⊕<br>High    | 186/1429<br>(13.0%)   | 123/1518<br>(8.1%)   | 0.62<br>(0.49–0.78)                  | 130 per 1000 patients      | 49 fewer deaths per 1000 (26 to 71 less)                     |
| <b>Major bleeding (CRITICAL OUTCOME)</b>  |                                                                                  |                                                 |                                                              |                         |                  |                 |                       |                      |                                      |                            |                                                              |
| 23 RCTs<br>12 months mean follow-up       | No serious risk of bias.<br>Lack of information regarding allocation concealment | No serious inconsistency<br>I <sup>2</sup> =0%  | Serious imprecision<br>Includes important benefits and harms | No serious indirectness | Not detected     | ⊕⊕⊕<br>Moderate | 81/2152<br>(3.7%)     | 96/2333<br>(4.1%)    | 0.96<br>(0.81–1.13)                  | 37 per 1000 patients       | 49 fewer major bleeding events per 1000 (71 less to 26 more) |

<sup>1</sup>Relative risk are those of self-management except for the outcome major bleeding.

RCT: randomised controlled trial, AFIB: atrial fibrillation. ⊕⊕⊕⊕: high quality, ⊕⊕⊕: moderate quality, ⊕⊕: low quality and ⊕: very low quality.

**Evidence profile 2. Dabigatran 150 mg vs. usual monitoring** Fehler! Verweisquelle konnte nicht gefunden werden.

| Trials                                          | Risk of bias                                               | Inconsistency                          | Imprecision                                               | Indirectness                                               | Publication bias | Overall quality | Study event rates (%) |                   | Relative effect (95%CI) | Absolute effect           |                                                         |
|-------------------------------------------------|------------------------------------------------------------|----------------------------------------|-----------------------------------------------------------|------------------------------------------------------------|------------------|-----------------|-----------------------|-------------------|-------------------------|---------------------------|---------------------------------------------------------|
|                                                 |                                                            |                                        |                                                           |                                                            |                  |                 | With home-monitoring  | With dabigatran   |                         | Risk with home-monitoring | Risk difference with home-monitoring (95%CI)            |
| <b>Thromboembolism (CRITICAL OUTCOME)</b>       |                                                            |                                        |                                                           |                                                            |                  |                 |                       |                   |                         |                           |                                                         |
| 1 RCT (18113 patients) 2 years median follow-up | No serious risk of bias. Warfarin administration unblinded | No serious inconsistency. Only one RCT | No serious imprecision                                    | No serious indirectness. Only patients with AFIB included. | Not detected     | ⊕⊕⊕⊕<br>High    | 199/6022 (1.69%)      | 134/ 6076 (1.11%) | 0.66 (0.53–0.82)        | 16 per 1000 patients      | 10 fewer thromboembolic events per 1000 (51 to 16 less) |
| <b>Death (CRITICAL OUTCOME)</b>                 |                                                            |                                        |                                                           |                                                            |                  |                 |                       |                   |                         |                           |                                                         |
| 1 RCT (18113 patients) 2 years median follow-up | No serious risk of bias Warfarin administration unblinded  | No serious inconsistency. Only one RCT | No serious imprecision                                    | No serious indirectness. Only patients with AFIB included. | Not detected     | ⊕⊕⊕<br>Moderate | 487/6022 (4.13%)      | 438/ 6076 (3.64%) | 0.88 (0.77–1.00)        | 41 per 1000 patients      | 8 fewer deaths per 1000 (0 to 18 less)                  |
| <b>Major bleeding (CRITICAL OUTCOME)</b>        |                                                            |                                        |                                                           |                                                            |                  |                 |                       |                   |                         |                           |                                                         |
| 1 RCT (18113 patients) 2 years median follow-up | No serious risk of bias Warfarin administration unblinded  | No serious inconsistency. Only one RCT | Serious imprecision Includes important benefits and harms | No serious indirectness. Only patients with AFIB included. | Not detected     | ⊕⊕⊕<br>Moderate | 397/6022 (3.36%)      | 375/ 6076 (3.11%) | 0.93 (0.81–1.07)        | 33 per 1000 patients      | 4 fewer major bleedings per 1000 (12 less to 4 more)    |
| <b>Myocardial infarction (CRITICAL OUTCOME)</b> |                                                            |                                        |                                                           |                                                            |                  |                 |                       |                   |                         |                           |                                                         |
| 1 RCT (18113 patients) 2 years median follow-up | No serious risk of bias Warfarin administration unblinded  | Not applicable                         | Serious imprecision Includes important benefits and harms | No important limitations                                   | Not detected     | ⊕⊕⊕<br>Moderate | -                     | -                 | 1.38 (1.00–1.91)        | 7 per 1000 patients       | 4 more myocardial infarctions per 1000 (0 to 8 more)    |

RCT: randomised controlled trial, AFIB: atrial fibrillation. ⊕⊕⊕⊕: high quality, ⊕⊕⊕: moderate quality, ⊕⊕: low quality and ⊕: very low quality.

**Evidence profile 3. Self-management vs. dabigatran**

| Trials                                                   | Risk of bias            | Inconsistency            | Imprecision            | Indirectness                                                                                  | Publication bias | Overall quality | Study event rates (%) |                 | Relative effect (95%CI) | Absolute effect                        |                                              |
|----------------------------------------------------------|-------------------------|--------------------------|------------------------|-----------------------------------------------------------------------------------------------|------------------|-----------------|-----------------------|-----------------|-------------------------|----------------------------------------|----------------------------------------------|
|                                                          |                         |                          |                        |                                                                                               |                  |                 | With home-monitoring  | With dabigatran |                         | Risk with home-monitoring <sup>1</sup> | Risk difference with home monitoring (95%CI) |
| <b>Thromboembolism (CRITICAL OUTCOME)</b>                |                         |                          |                        |                                                                                               |                  |                 |                       |                 |                         |                                        |                                              |
| 12 RCTs of self-management, 1 of dabigatran <sup>2</sup> | No serious risk of bias | No serious inconsistency | No serious imprecision | Very serious indirectness. Indirect comparison. Dabigatran trial only includes AFIB patients. | Not detected     | ⊕⊕<br>Low       | -                     | -               | 0.73 (0.48-1.10)        | 20 per 1000 patients                   | NS                                           |
| <b>Death (CRITICAL OUTCOME)</b>                          |                         |                          |                        |                                                                                               |                  |                 |                       |                 |                         |                                        |                                              |
| 9 RCTs of self-management, 1 of dabigatran <sup>1</sup>  | No serious risk of bias | No serious inconsistency | No serious imprecision | Serious indirectness. Indirect comparison. Dabigatran trial only includes AFIB patients.      | Not detected     | ⊕⊕<br>Low       | -                     | -               | 0.64 (0.40-1.01)        | 81 per 1000 patients                   | NS                                           |
| <b>Major bleeding (CRITICAL OUTCOME)</b>                 |                         |                          |                        |                                                                                               |                  |                 |                       |                 |                         |                                        |                                              |
| 23 RCTs of home monitoring, 1 of dabigatran <sup>1</sup> | No serious risk of bias | No serious inconsistency | No serious imprecision | Serious indirectness. Indirect comparison. Dabigatran trial only includes AFIB patients.      | Not detected     | ⊕⊕<br>Low       | -                     | -               | 1.15 (0.83-1.60)        | 41 per 1000 patients                   | NS                                           |

<sup>1</sup> 12 months of mean follow up in the self-management trials and 24 months median follow up in the dabigatran trial.

<sup>2</sup> Relative risk are those of self-management except for the outcome major bleeding.

RCT: randomised controlled trial, AFIB: atrial fibrillation. ⊕⊕⊕⊕: high quality, ⊕⊕⊕: moderate quality, ⊕⊕: low quality and ⊕: very low quality.

## Appendix 2

**Figure A. Risk of publication bias assessed with a funnel plot (outcome: thromboembolic events)**

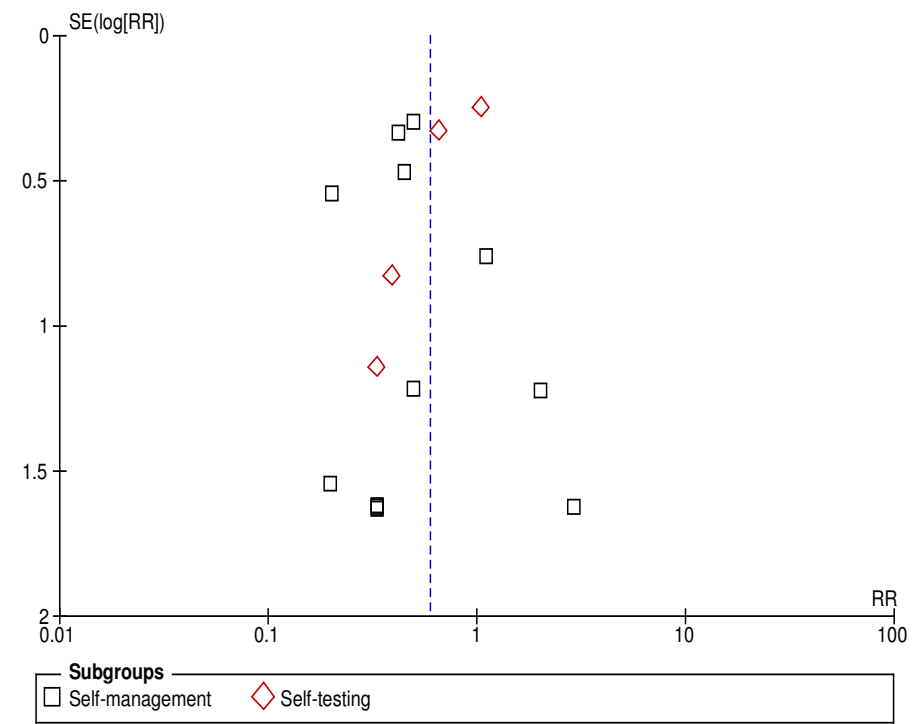

**Figure B. Risk of publication bias assessed with a funnel plot (outcome major: major bleeding)**

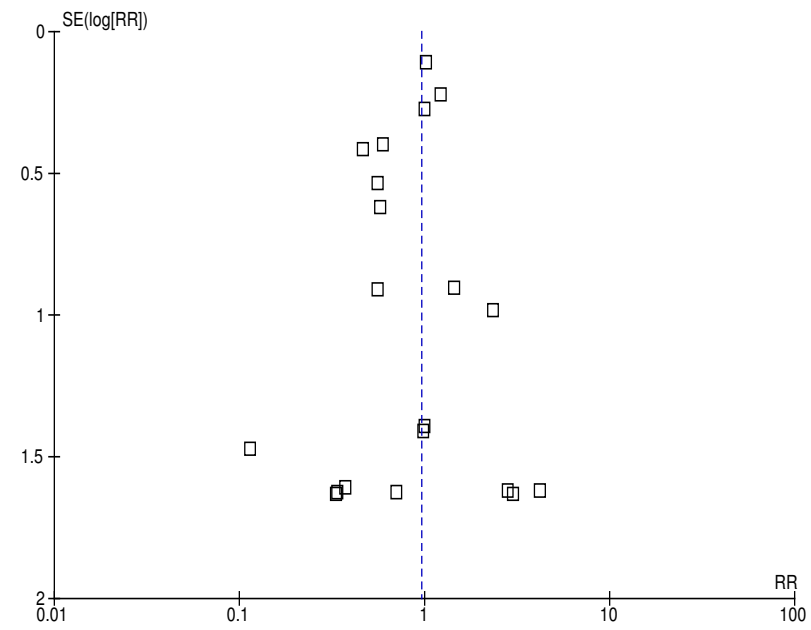

### Appendix 3

#### 1. Direct and indirect comparisons of Dabigatran and usual management/home-monitoring

Dabigatran Dose =110mg

| Outcomes        | Direct comparison (RR, 95%CI)   |                                      | Indirect comparison (RR, 95%CI, p-value) |
|-----------------|---------------------------------|--------------------------------------|------------------------------------------|
|                 | Dabigatran vs. Usual management | Home-monitoring vs. Usual management | Home-monitoring vs. Dabigatran           |
| Thromboembolism | 0.91 (0.74-1.11)                | 0.59 (0.46-0.77)                     | 0.65 (0.47-0.90), 0.01                   |
| Mortality       | 0.91 (0.80-1.03)                | 0.76 (0.58, 0.99)                    | 0.84 (0.62-1.12), 0.23                   |
| Major bleeding  | 0.80 (0.69-0.93)                | 0.95 (0.80-1.12)                     | 1.19 (0.95-1.49), 0.13                   |

Dabigatran Dose =150mg

| Outcomes        | Direct comparison (RR, 95%CI)   |                                      | Indirect comparison (RR, 95%CI, p-value) |
|-----------------|---------------------------------|--------------------------------------|------------------------------------------|
|                 | Dabigatran vs. Usual management | Home-monitoring vs. Usual management | Home-monitoring vs. Dabigatran           |
| Thromboembolism | 0.66 (0.53-0.82)                | 0.59 (0.46-0.77)                     | 0.89 (0.64-1.25), 0.52                   |
| Mortality       | 0.88 (0.77-1.00)                | 0.76 (0.58, 0.99)                    | 0.86 (0.64-1.16), 0.33                   |
| Major bleeding  | 0.93 (0.81-1.07)                | 0.95 (0.80-1.12)                     | 1.02 (0.82-1.27), 0.85                   |

**2. Direct and indirect comparisons of Dabigatran and usual management/self-management /self-testing**

Dabigatran Dose =110mg

| Outcomes        | Direct comparison (RR, 95%CI)   |                                      | Indirect comparison (RR, 95%CI, p-value) |
|-----------------|---------------------------------|--------------------------------------|------------------------------------------|
|                 | Dabigatran vs. Usual management | Self-management vs. Usual management | Self-management vs. Dabigatran           |
| Thromboembolism | 0.91 (0.74-1.11)                | 0.45 (0.32-0.64)                     | 0.49 (0.33-0.74), 0.001                  |
| Mortality       | 0.91 (0.80-1.03)                | 0.62 (0.49, 0.78)                    | 0.68 (0.52-0.89), 0.004                  |
| Major bleeding  | 0.80 (0.69-0.93)                | 1.07 (0.79-1.44)                     | 1.34 (0.96-1.87).0.09                    |

Dabigatran Dose =150mg

| Outcomes        | Direct comparison (RR, 95%CI)   |                                      | Indirect comparison (RR, 95%CI, p-value) |
|-----------------|---------------------------------|--------------------------------------|------------------------------------------|
|                 | Dabigatran vs. Usual management | Self-management vs. Usual management | Self-management vs. Dabigatran           |
| Thromboembolism | 0.66 (0.53-0.82)                | 0.45 (0.32-0.64)                     | 0.68 (0.45-1.03), 0.07                   |
| Mortality       | 0.88 (0.77-1.00)                | 0.62 (0.49, 0.78)                    | 0.70 (0.54-0.92), 0.01                   |
| Major bleeding  | 0.93 (0.81-1.07)                | 1.07 (0.79-1.44)                     | 1.15 (0.83-1.60), 0.41                   |

Dabigatran Dose =110mg

| Outcomes        | Direct comparison (RR, 95%CI)   |                                   | Indirect comparison (RR, 95%CI, p-value) |
|-----------------|---------------------------------|-----------------------------------|------------------------------------------|
|                 | Dabigatran vs. Usual management | Self-testing vs. Usual management | Self-testing vs. Dabigatran              |
| Thromboembolism | 0.91 (0.74-1.11)                | 0.72 (0.51-1.02)                  | 0.79 (0.53-1.18), 0.25                   |
| Mortality       | 0.91 (0.80-1.03)                | 0.95 (0.78-1.15)                  | 1.04 (0.83-1.32), 0.72                   |
| Major bleeding  | 0.80 (0.69-0.93)                | 0.90 (0.74-1.09)                  | 1.12 (0.88-1.44), 0.35                   |

Dabigatran Dose =150mg

| Outcomes        | Direct comparison (RR, 95%CI)   |                                   | Indirect comparison (RR, 95%CI, p-value) |
|-----------------|---------------------------------|-----------------------------------|------------------------------------------|
|                 | Dabigatran vs. Usual management | Self-testing vs. Usual management | Self-testing vs. Dabigatran              |
| Thromboembolism | 0.66 (0.53-0.82)                | 0.72 (0.51-1.02)                  | 1.09 (0.721-1.64), 0.68                  |
| Mortality       | 0.88 (0.77-1.00)                | 0.95 (0.78-1.15)                  | 1.08 (0.85-1.36), 0.52                   |
| Major bleeding  | 0.93 (0.81-1.07)                | 0.90 (0.74-1.09)                  | 0.97 (0.76-1.23), 0.79                   |

**Appendix 4**

**Subgroup analyses likelihood criteria (self-management vs. self-testing)**

| Criteria                                                                                                 | Outcomes             |                      |
|----------------------------------------------------------------------------------------------------------|----------------------|----------------------|
|                                                                                                          | Mortality            | Thrombosis           |
| <b>Design</b>                                                                                            |                      |                      |
| 1. Is the subgroup variable a characteristic measured at baseline or after randomisation?*               | √                    | √                    |
| 2. Is the effect suggested by comparisons within rather than between studies?                            | X                    | X                    |
| √. Was the hypothesis specified a priori?                                                                | √                    | √                    |
| 4. Was the direction of the subgroup effect specified a priori*                                          | X                    | X                    |
| 5. Was the subgroup effect one of a small number of hypothesised effects tested?                         | √                    | √                    |
| <b>Analysis</b>                                                                                          |                      |                      |
| 6. Does the interaction test suggest a low likelihood that chance explains the apparent subgroup effect? | √                    | √                    |
| 7. Is the significant subgroup effect independent?                                                       | √                    | √                    |
| <b>Context</b>                                                                                           |                      |                      |
| 8. Is the size of the subgroup effect large?                                                             | √                    | √                    |
| 9. Is the interaction consistent across studies?                                                         | √                    | √                    |
| 10. Is the interaction consistent across closely related outcomes within the study?*                     | √                    | √                    |
| 11. Is there indirect evidence that supports the hypothesised interaction (biological rationale)?        | √                    | √                    |
| Likelihood of subgroup effect                                                                            | <b>Moderate/High</b> | <b>Moderate/High</b> |
